# Supplementary material for: Functionalized titania nanoparticles for mercury scavenging
Source: Royal Society of Chemistry journal article supplement (doi:10.1039/b617280f), 2007-01-01
Supplement: b617280f.pdf [file b617280f.pdf]

## Supporting Information

### “Functionalized Hybrid Nanoparticles for Mercury Scavenging”

Xiaoe Li,<sup>\*a</sup> Javier Pérez-Hernández,<sup>b</sup> Saif A. Haque,<sup>a</sup> James R. Durrant<sup>a</sup> and Emilio Palomares<sup>\*b</sup>

<sup>a</sup> Department of Chemistry, Imperial College London, London, UK SW7 2AY

<sup>b</sup> Institute of Chemical Research of Catalonia ( ICIQ), Avda. Països Catalans, 16, Tarragona 43007, Tarragona (Spain). Fax: +34 977 920 224; Tel.: +34 977 920 241; E-mail: [epalomares@iciq.es](mailto:epalomares@iciq.es).

#### Determination of the scavenged mercury by the mesoporous N719/TiO<sub>2</sub> film

The mercury scavenging experiments were performed dipping the N719/TiO<sub>2</sub> film (1 cm<sup>2</sup> area) in different mercury aqueous solutions ranging from 1 to 30 μM concentrations during 10 minutes.

In order to quantify colorimetrically the mercury remaining in the solution, after the scavenging process, we added 12 μl from a 2 mM N719 stock solution in ethanol to 1 ml of the mercury aqueous solution. The UV-Visible spectrum of the mixture was measured. The results are shown in **Figure S1**.

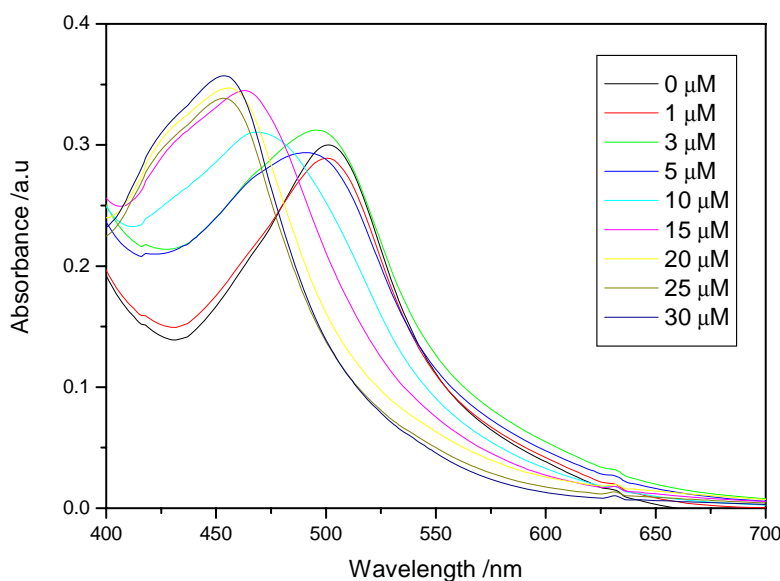

**Figure S1.** UV-Visible spectra upon addition of 12 μl from a 2 mM N719 solution in ethanol to 1 ml of HgCl<sub>2</sub> aqueous solution. The inset shows the mercury concentration range used.

Using the data from **Figure S1** we can determine the mercury concentration left after the immersion of the scavenging film. To this end, we fitted the experimental data to a equation that relates the absorption changes upon mercury binding to the N719 molecule in solution.

$$R = 1.76 + 0.03*[Hg^{2+}]$$

Where  $R = \frac{Abs_{\lambda_1}}{Abs_{\lambda_2}}$ ,  $\lambda_1 = 508$  nm (maximum absorbance in the absence of  $Hg^{2+}$  ions) and

$\lambda_2 = 438$  nm (maximum absorbance in the presence of  $Hg^{2+}$  ions). The linear fitting is illustrated in **Figure S2**. Using this calibration curve we can extrapolate the mercury concentration present in the aqueous solutions after the immersion of the scavenging  $TiO_2/N719$  films.

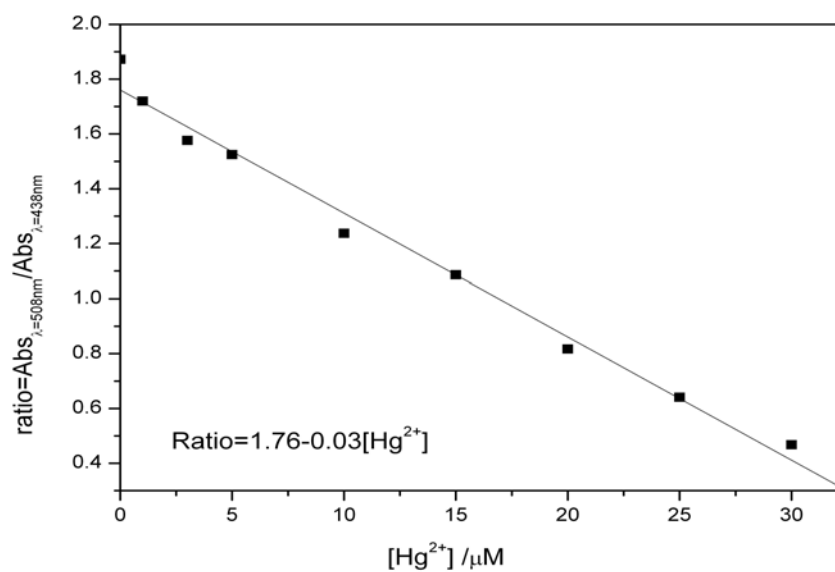

**Figure S2.** Calibration curve for the N719 solution chemosensor in ethanol.

### The selectivity of the solution based mercury detection.

The colorimetric mercury sensing experiments, based upon the addition of 12  $\mu$ L of N719 in ethanol to the water based samples after immersing the scavenging film, were carried out for different samples containing other metal ions as shown in **Figure S3**. The aim was to illustrate the low response of other metal ions such as Cadmium or Lead to the N719 molecules.

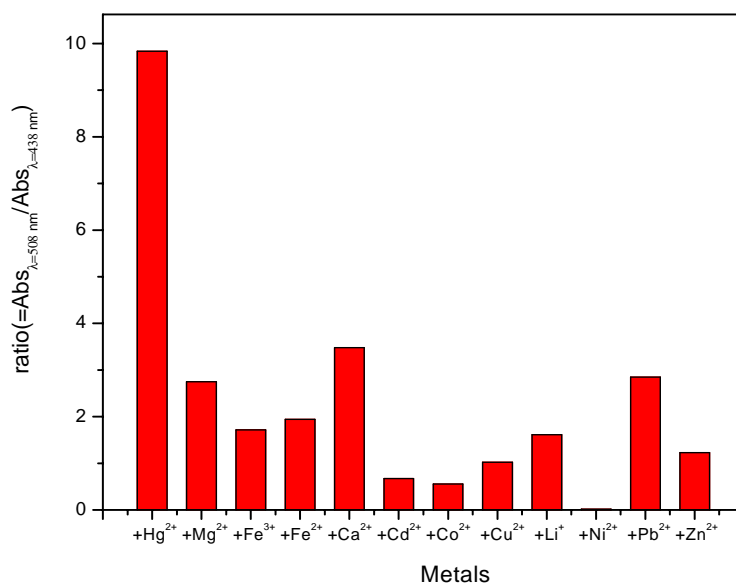

**Figure S3.** Changes on the absorption ratio ( $\lambda_1/\lambda_2$ ) for several metal ions after the dipping of the **TiO<sub>2</sub>/N719** films into the aqueous solution containing different metal ions.
